# Supplementary material
Source: PubMed Central journal article supplement (PMC4584203)

**Figure S1:** Distribution of propensity scores in users and non-users in the full cohort. C-statistic = 0.68 for the propensity score model

**Panel A:** Full sample; **Panel B:** Matched sample

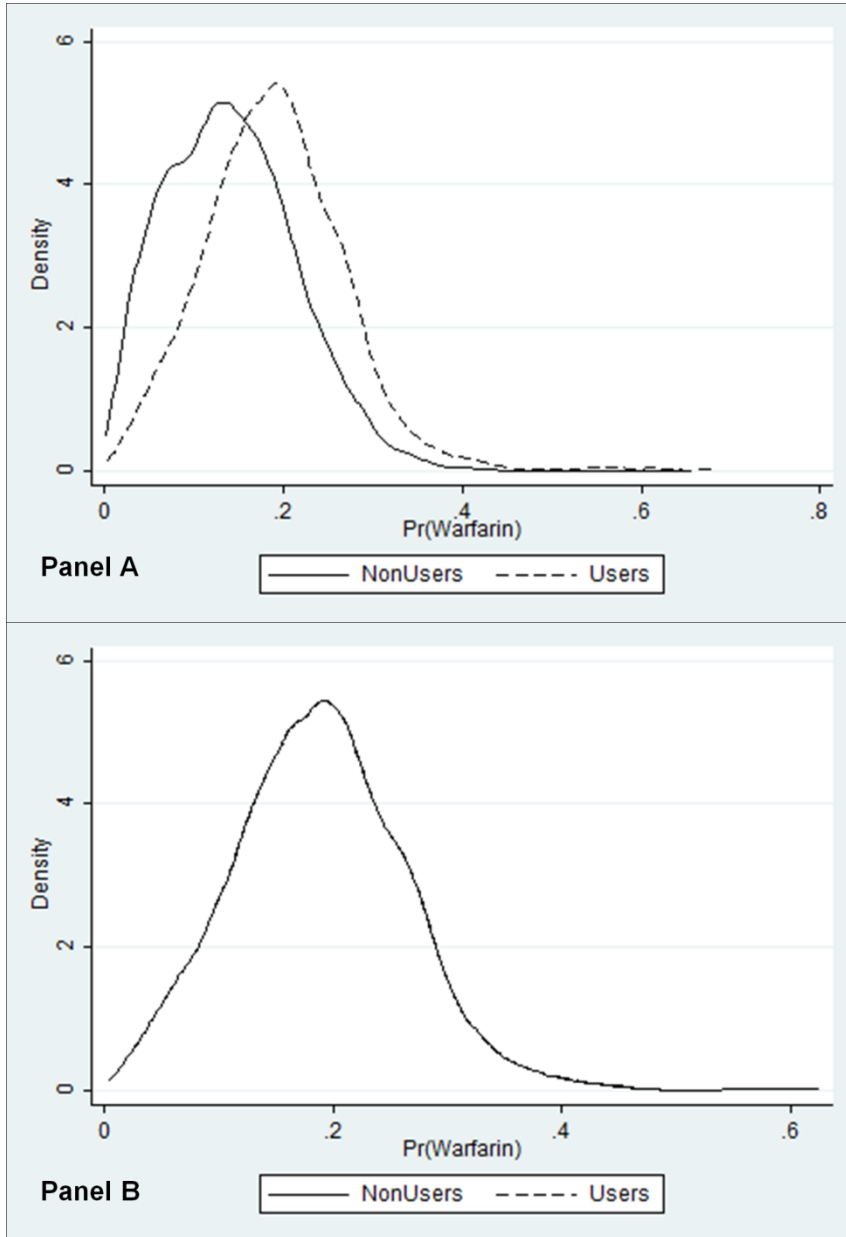

Supplement: NIHMS704910-supplement-1.pdf [file NIHMS704910-supplement-1.pdf]
