# Supplementary material
Source: PubMed Central journal article supplement (PMC4584203)
Supplement: NIHMS704910-supplement-3.pdf [file NIHMS704910-supplement-3.pdf]

**Table S1:** Diagnosis codes used to identify valvular disease associated with atrial fibrillation.

| <b>Diagnosis code type</b> | <b>Code</b>                                                                                                                                                   |
|----------------------------|---------------------------------------------------------------------------------------------------------------------------------------------------------------|
| ICD9 Diagnosis Code        | 394.0, 394.2, 396.0, 396.1, 396.8,<br>V43.3, V42.2, 996.02 ,996.71                                                                                            |
| ICD9 Procedure Code        | 35.10, 35.14, 35.20, 35.21, 35.22, 35.23,<br>35.24, 35.25, 35.26, 35.27, 35.28                                                                                |
| CPT Code                   | 33400, 33401, 33403, 33405, 33406,<br>33410, 33411, 33412, 33413, 33422,<br>33425, 33426, 33430, 33460, 33463,<br>33464, 33465, 33472, 33474, 33475,<br>92990 |
| DRG                        | 104, 105, 135, 136, 137, 216, 217, 218,<br>219, 220, 221                                                                                                      |
