# Supplementary material
Source: PubMed Central journal article supplement (PMC4584203)
Supplement: NIHMS704910-supplement-4.pdf [file NIHMS704910-supplement-4.pdf]

**Table S2:** Outcome definition by USRDS cause of death and ICD9 diagnosis code. All ICD9 diagnosis codes had to be from inpatient records.

| <b>Outcome</b>            | <b>USRDS cause of death</b>                                 | <b>ICD9 diagnosis code</b>                        |
|---------------------------|-------------------------------------------------------------|---------------------------------------------------|
| Gastrointestinal bleeding | Gastrointestinal bleeding                                   | Stringent criteria from Yang et al. <sup>17</sup> |
| Hemorrhagic stroke        | NA                                                          | 430, 431, 432.x                                   |
| Ischemic stroke           | NA                                                          | 433.x1, 434.x1, 436, 437.1                        |
| Any stroke                | Cerebrovascular accident including intracranial hemorrhage, | 430, 431, 432.x, 433.x1, 434.x1, 436, 437.1       |
