# Supplementary material
Source: PubMed Central journal article supplement (PMC4584203)
Supplement: NIHMS704910-supplement-5.pdf [file NIHMS704910-supplement-5.pdf]

**Table S3:** Number of events, follow-up time, incidence rates, and hazard ratios for all study outcomes based on a propensity-score matched cohort of 1829 warfarin users and 1829 non-users.

| Outcome                         | Analysis | Exposure group | Number of events | Follow-up time (years) |        | Incidence rate (per 100 person-years) | Hazard ratio (95% CI) |
|---------------------------------|----------|----------------|------------------|------------------------|--------|---------------------------------------|-----------------------|
|                                 |          |                |                  | Mean ± SD              | Median |                                       |                       |
| <b>All-cause mortality</b>      | ITT      | Warfarin       | 760              | 1.41 ± 1.12            | 1.14   | 29.4                                  | 0.93 (0.81-1.05)      |
|                                 |          | No warfarin    | 773              | 1.38 ± 1.12            | 1.07   | 30.6                                  |                       |
|                                 | AT60     | Warfarin       | 331              | 0.66 ± 0.70            | 0.41   | 27.3                                  | 0.80 (0.67-0.95)      |
|                                 |          | No warfarin    | 641              | 1.18 ± 1.06            | 0.86   | 29.8                                  |                       |
|                                 | AT30     | Warfarin       | 233              | 0.46 ± 0.54            | 0.26   | 27.8                                  | 0.78 (0.64-0.95)      |
|                                 |          | No warfarin    | 641              | 1.18 ± 1.06            | 0.86   | 29.8                                  |                       |
| <b>Cardiovascular mortality</b> | ITT      | Warfarin       | 322              | 1.41 ± 1.12            | 1.34   | 12.4                                  | 0.90 (0.73-1.10)      |
|                                 |          | No warfarin    | 325              | 1.38 ± 1.12            | 1.08   | 12.8                                  |                       |
|                                 | AT60     | Warfarin       | 146              | 0.66 ± 0.70            | 0.41   | 12.1                                  | 0.82 (0.63-1.08)      |
|                                 |          | No warfarin    | 272              | 1.18 ± 1.06            | 0.86   | 12.7                                  |                       |
|                                 | AT30     | Warfarin       | 100              | 0.46 ± 0.54            | 0.26   | 11.9                                  | 0.82 (0.60-1.13)      |
|                                 |          | No warfarin    | 272              | 1.17 ± 1.06            | 0.86   | 12.7                                  |                       |
| <b>Ischemic stroke</b>          | ITT      | Warfarin       | 49               | 1.35 ± 1.09            | 1.07   | 2.0                                   | 0.77 (0.44-1.32)      |

|                                   |      |             |    |             |      |     |                  |
|-----------------------------------|------|-------------|----|-------------|------|-----|------------------|
|                                   |      | No warfarin | 47 | 1.33 ± 1.10 | 1.03 | 1.9 |                  |
|                                   | AT60 | Warfarin    | 24 | 0.66 ± 0.69 | 0.41 | 2.0 | 1.13 (0.57-2.27) |
|                                   |      | No warfarin | 41 | 1.16 ± 1.05 | 0.84 | 1.9 |                  |
|                                   | AT30 | Warfarin    | 18 | 0.46 ± 0.54 | 0.25 | 2.2 | 1.36 (0.63-2.97) |
|                                   |      | No warfarin | 41 | 1.16 ± 1.05 | 0.84 | 1.9 |                  |
| <b>Hemorrhagic stroke</b>         | ITT  | Warfarin    | 19 | 1.37 ± 1.10 | 1.08 | 0.7 | 0.90 (0.37-2.21) |
|                                   |      | No warfarin | 22 | 1.35 ± 1.10 | 1.04 | 0.9 |                  |
|                                   | AT60 | Warfarin    | 12 | 0.66 ± 0.70 | 0.41 | 1.0 | 1.13 (0.46-3.84) |
|                                   |      | No warfarin | 19 | 1.17 ± 1.05 | 0.85 | 0.9 |                  |
|                                   | AT30 | Warfarin    | 10 | 0.46 ± 0.54 | 0.28 | 1.2 | 1.75 (0.51-5.98) |
|                                   |      | No warfarin | 19 | 1.17 ± 1.05 | 0.85 | 0.9 |                  |
| <b>Any stroke or stroke death</b> | ITT  | Warfarin    | 85 | 1.35 ± 1.09 | 1.06 | 3.5 | 0.88 (0.58-1.32) |
|                                   |      | No warfarin | 86 | 1.33 ± 1.10 | 1.02 | 3.5 |                  |
|                                   | AT60 | Warfarin    | 45 | 0.66 ± 0.69 | 0.41 | 3.7 | 1.24 (0.73-2.10) |
|                                   |      | No warfarin | 72 | 1.16 ± 1.05 | 0.84 | 3.4 |                  |
|                                   | AT30 | Warfarin    | 35 | 0.46 ± 0.54 | 0.25 | 4.2 | 1.42 (0.79-2.56) |
|                                   |      | No warfarin | 72 | 1.16 ± 1.05 | 0.84 | 3.4 |                  |
| <b>Gastrointestinal bleeding</b>  | ITT  | Warfarin    | 96 | 1.32 ± 1.09 | 1.02 | 4.0 | 1.29 (0.90-1.85) |
|                                   |      | No warfarin | 90 | 1.31 ± 1.09 | 1.00 | 3.7 |                  |

|                                      |      |             |     |             |      |      |                  |
|--------------------------------------|------|-------------|-----|-------------|------|------|------------------|
|                                      | AT60 | Warfarin    | 55  | 0.65 ± 0.69 | 0.40 | 4.6  | 1.08 (0.69-1.69) |
|                                      |      | No warfarin | 77  | 1.15 ± 1.05 | 0.83 | 3.7  |                  |
|                                      | AT30 | Warfarin    | 44  | 0.45 ± 0.53 | 0.25 | 5.3  | 1.14 (0.69-1.87) |
|                                      |      | No warfarin | 77  | 1.15 ± 1.05 | 0.83 | 3.7  |                  |
| <b>Composite outcome<sup>a</sup></b> | ITT  | Warfarin    | 825 | 1.29 ± 1.08 | 1.00 | 34.8 | 0.94 (0.83-1.07) |
|                                      |      | No warfarin | 830 | 1.29 ± 1.09 | 0.97 | 35.2 |                  |
|                                      | AT60 | Warfarin    | 390 | 0.65 ± 0.69 | 0.40 | 32.9 | 0.85 (0.72-1.00) |
|                                      |      | No warfarin | 700 | 1.13 ± 1.04 | 0.80 | 33.8 |                  |
|                                      | AT30 | Warfarin    | 284 | 0.45 ± 0.53 | 0.25 | 34.4 | 0.86 (0.72-1.04) |
|                                      |      | No warfarin | 700 | 1.13 ± 1.04 | 0.80 | 33.8 |                  |

AT30 – as treated analyses where patients censored 30 days after drug supply ends, AT60 – as treated where patients censored 60 days after end of drug supply, CI – confidence interval, ITT – intention to treat, SD – standard deviation

<sup>a</sup>Composite outcome includes any stroke or stroke death, gastrointestinal bleeding, and all-cause mortality.
