# Supplementary material
Source: PubMed Central journal article supplement (PMC4584203)
Supplement: NIHMS704910-supplement-6.pdf [file NIHMS704910-supplement-6.pdf]

**Table S4:** Number of events, follow-up time, incidence rates, and hazard ratios for all study outcomes based on an inverse probability of treatment weighted population of approximately 15% warfarin users and 85% non-users using the full cohort of 12,284 patients and as treated analyses where patients were censored 30 days after their drug supply ran out.

| Outcome                           | Analysis          | Exposure group | Number of events | Follow-up time (years) |        | Incidence rate (per 100 person-years) | Hazard ratio (95% CI) |
|-----------------------------------|-------------------|----------------|------------------|------------------------|--------|---------------------------------------|-----------------------|
|                                   |                   |                |                  | Mean ± SD              | Median |                                       |                       |
| <b>All-cause mortality</b>        | AT30 <sup>a</sup> | Warfarin       | 275              | 0.41 ± 0.47            | 0.23   | 33.0                                  | 0.82 (0.69-0.97)      |
|                                   |                   | No warfarin    | 4006             | 1.20 ± 1.10            | 0.85   | 31.9                                  |                       |
| <b>Cardiovascular mortality</b>   | AT30 <sup>a</sup> | Warfarin       | 131              | 0.41 ± 0.47            | 0.23   | 16.1                                  | 0.86 (0.67-1.11)      |
|                                   |                   | No warfarin    | 2064             | 1.23 ± 1.14            | 0.86   | 16.3                                  |                       |
| <b>Ischemic stroke</b>            | AT30 <sup>a</sup> | Warfarin       | 23               | 0.40 ± 0.48            | 0.22   | 2.8                                   | 0.73 (0.41-1.31)      |
|                                   |                   | No warfarin    | 494              | 1.31 ± 1.21            | 0.91   | 3.7                                   |                       |
| <b>Hemorrhagic stroke</b>         | AT30 <sup>a</sup> | Warfarin       | 24               | 0.40 ± 0.48            | 0.22   | 2.9                                   | 2.74 (1.16-6.44)      |
|                                   |                   | No warfarin    | 170              | 1.34 ± 1.23            | 0.95   | 1.2                                   |                       |
| <b>Any stroke or stroke death</b> | AT30 <sup>a</sup> | Warfarin       | 51               | 0.45 ± 0.54            | 0.25   | 5.9                                   | 0.97 (0.60-1.56)      |
|                                   |                   | No warfarin    | 650              | 1.18 ± 1.12            | 0.80   | 5.2                                   |                       |
| <b>Gastrointestinal bleeding</b>  | AT30 <sup>a</sup> | Warfarin       | 85               | 0.40 ± 0.47            | 0.22   | 10.4                                  | 1.52 (1.00-2.29)      |
|                                   |                   | No warfarin    | 774              | 1.26 ± 1.18            | 0.87   | 6.0                                   |                       |

|                                      |                   |             |      |             |      |      |                  |
|--------------------------------------|-------------------|-------------|------|-------------|------|------|------------------|
| <b>Composite outcome<sup>b</sup></b> | AT30 <sup>a</sup> | Warfarin    | 328  | 0.43 ± 0.49 | 0.24 | 41.1 | 0.92 (0.79-1.07) |
|                                      |                   | No warfarin | 4219 | 1.09 ± 1.03 | 0.75 | 37.1 |                  |

AT30 – as treated, CI – confidence interval, ITT – intention to treat, SD – standard deviation

<sup>a</sup>Stratified Cox by year when atrial fibrillation was diagnosed.

<sup>b</sup>Composite outcome includes any stroke or stroke death, gastrointestinal bleeding, and all-cause mortality.
